# Supplementary material
Source: MDPI journal article supplement (https://www.mdpi.com/2073-445X/7/4/117)
Supplement: s1 [file s1]

# Assessing Local Indigenous Knowledge and Information Sources on Biodiversity, Conservation and Protected Area Management at Khuvsgol Lake National Park, Mongolia

Christopher McCarthy, Hitoshi Shinjo, Buho Hoshino and Erdenebuyan Enkhjargal

This supplementary material supports the main text as follows:

**Table S1.** Questionnaire.

| No. | Question                                                                                                | Response                                                                                      |
|-----|---------------------------------------------------------------------------------------------------------|-----------------------------------------------------------------------------------------------|
| D1  | Date                                                                                                    |                                                                                               |
| D2  | Name                                                                                                    |                                                                                               |
| D3  | Phone number                                                                                            |                                                                                               |
| D4  | Sex                                                                                                     | Male / Female                                                                                 |
| D5  | Age                                                                                                     | 0-19 20-29 30-39 40-49 50-59 ≥ 60                                                             |
| D6  | Occupation                                                                                              | Herder Construction Fisherman<br>Government Worker Student Teacher<br>Tourist Guide Pensioner |
| D7  | Education                                                                                               | Primary Middle High University<br>Vocational Training                                         |
| D8  | Residence type                                                                                          | Ger Wooden house                                                                              |
| E9  | How long have you lived in Khuvsgol Lake National Park?                                                 |                                                                                               |
| E10 | Is environmental protection a priority in your daily life?                                              | Yes No Maybe<br>Don't know                                                                    |
| E11 | In your opinion, why is environmental protection important?                                             |                                                                                               |
| E12 | Do you believe environmental protection is important for your wellbeing?                                | Yes No Maybe<br>Don't know                                                                    |
| E13 | Do you agree with the statement that human disturbance can result in irreversible environmental damage? | Yes No Maybe<br>Don't know                                                                    |
| E14 | Are you aware of the rules, regulations and government policies of Khuvsgol Lake National Park?         | Yes No Maybe<br>Don't know                                                                    |
| E15 | Can you identify the institution that manages Khuvsgol Lake National Park?                              | Yes No                                                                                        |
| E16 | If 'Yes' to E15, what is the name of the institution that manages KLNP?                                 |                                                                                               |
| E17 | Where is the park management office located?                                                            |                                                                                               |
| E18 | Are you aware of conservation activities in Khuvsgol Lake National Park?                                | Yes No Maybe<br>Don't know                                                                    |
| E19 | How often do you participate in conservation activities in Khuvsgol Lake National Park?                 | Always Often<br>Sometimes Never                                                               |

|       |                                                                                                              |                                                                                                                        |
|-------|--------------------------------------------------------------------------------------------------------------|------------------------------------------------------------------------------------------------------------------------|
| E20   | How would you characterize trust between local inhabitants and park rangers / authorities?                   | High      Neutral      Low<br>Don't know                                                                               |
| E21   | Can local authorities be trusted to resolve issues and grievances?                                           | Yes      No      Maybe<br>Don't know                                                                                   |
| E22   | Please tell me the main reasons you don't trust local authorities?                                           |                                                                                                                        |
| E23   | Are you satisfied with the management of Khuvsgol Lake National Park?                                        | Yes      No      Maybe<br>Don't know                                                                                   |
| E24   | What is the name of your local government representative?                                                    |                                                                                                                        |
| E25   | Are you aware of changes to the environment in recent years?                                                 | Yes      No      Maybe<br>Don't know                                                                                   |
| E26   | If 'Yes' to E24, can you provide examples of environmental change?                                           |                                                                                                                        |
| E27   | Are you aware of the laws for protected species at Khuvsgol Lake National Park?                              | Yes      No      Maybe<br>Don't know                                                                                   |
| E28   | Looking at the images can you identify which of these animals live within Khuvsgol Lake National Park?       | Argali   Brown bear   Grayling   Musk deer<br>Elk   Ibex   Sable   Siberian moose   Wolf<br>Wolverine                  |
| E29   | Which of these animals are endangered or protected species?                                                  | Argali   Brown bear   Grayling   Musk deer<br>Elk   Ibex   Sable   Siberian moose   Wolf<br>Wolverine                  |
| E30   | From your experience, how does an animal within the park become endangered?                                  |                                                                                                                        |
| E31   | Which activities do you feel should be prohibited in Khuvsgol Lake National Park?                            | Hunting   Fishing   Tourism   House<br>construction   Mining   Logging   Other:                                        |
| I32   | What is your main source for information about biodiversity and conservation at Khuvsgol Lake National Park? | Television, radio   Park rangers   Friends,<br>family   NGOs   School   Personal<br>Experience   SMS messages   Other: |
| I33   | How often do you receive information about Khuvsgol Lake National Park and conservation activities?          | Always      Often<br>Sometimes      Never                                                                              |
| T34   | Does tourism have a positive impact on your livelihood?                                                      | Yes      No      Maybe<br>Don't know                                                                                   |
| T35   | Do you agree that tourism provides an equal share of benefits?                                               | Yes      No      Maybe<br>Don't know                                                                                   |
| T36   | Would you like to see more regulation of tourism at KLNP?                                                    | Yes      No      Maybe<br>Don't know                                                                                   |
| T37   | IF 'Yes' to T36, what type of regulation would you like to see?                                              |                                                                                                                        |
| T38   | What problems do you face as a result of growing tourism?                                                    |                                                                                                                        |
| T39   | How would you describe the level of trust you have with the tourist companies?                               | High      Neutral      Low<br>Don't know                                                                               |
| T40   | What is the main source of distrust with the tourist companies?                                              |                                                                                                                        |
| T41   | What impact does tourism have on the environment?                                                            |                                                                                                                        |
| ICT42 | Do you own a mobile phone?                                                                                   | Yes      No<br>How many:                                                                                               |

|       |                                                                                     |                                                                                                                                                                                             |
|-------|-------------------------------------------------------------------------------------|---------------------------------------------------------------------------------------------------------------------------------------------------------------------------------------------|
| ICT43 | Do you own a smart phone or a traditional handset?                                  | Smart phone   Traditional handset                                                                                                                                                           |
| ICT44 | Which telecom company do you use?                                                   | Mobicom   Unitel   Skytel   G Mobile                                                                                                                                                        |
| ICT45 | Can you get a phone signal at your home?                                            | Yes   No                                                                                                                                                                                    |
| ICT47 | How far do you have to travel to obtain a signal?                                   | 0-1 km   2-5 km   6-10 km   11 km or more                                                                                                                                                   |
| ICT48 | How do you use your phone?                                                          | Send / receive SMS<br>Take pictures / video<br>Access the internet<br>Get political news<br>Get consumer information<br>Get health/dietary information<br>Make or receive payments<br>Other |
| ICT49 | Do you use social media?                                                            | Yes   No                                                                                                                                                                                    |
| ICT50 | Which social media sites do you use?                                                | Facebook   YouTube   Twitter   Yahoo<br>Other                                                                                                                                               |
| ICT51 | For what reason(s) do you use social media?                                         | Stay in touch with family / friends<br>Share views about music and movies<br>Share views about religion<br>Share views about politics<br>Share views about work<br>Other                    |
| ICT52 | What are common challenges you face when using your phone?                          | Cost for handset   Cost of units<br>Charging   Accessing service<br>Learning how to use it   Other                                                                                          |
| ICT53 | How do you charge your cell phone?                                                  | Solar panel   Wind turbine<br>Electricity grid   Charging is a problem   Other                                                                                                              |
| ICT54 | How often do you use your phone per day?                                            | 0-10 minutes<br>11-30 minutes<br>31-60 minutes<br>more than 60 minutes                                                                                                                      |
| ICT55 | Do you think cell phones / tablets are a good way to receive information?           | Yes   No   Maybe<br>Don't know                                                                                                                                                              |
| ICT56 | How often do access the internet with your phone?                                   | Once or twice per day<br>Once or twice per week<br>Once or twice per month<br>Rarely<br>Never<br>Other                                                                                      |
| ICT57 | What would you describe as the main limitation of using the internet on your phone? | It is very slow<br>Websites don't look very good / screen is too small<br>It is expensive<br>It is only good for limited use<br>Lack of knowledge about the internet and websites<br>Other  |
| ICT58 | Where/how did you get your cell phone?                                              | Purchased at a shop<br>Purchased from a friend<br>Traded                                                                                                                                    |

|       |                                                          | Other                                                                                                                                                                                                                                                                                                                                                                      |
|-------|----------------------------------------------------------|----------------------------------------------------------------------------------------------------------------------------------------------------------------------------------------------------------------------------------------------------------------------------------------------------------------------------------------------------------------------------|
| ICT59 | How much was your cell phone?                            |                                                                                                                                                                                                                                                                                                                                                                            |
| ICT60 | How would you like to use your cell phone in the future? | Send / receive SMS<br>Take pictures / video<br>Access the internet<br>Get political news<br>Get consumer information<br>Get health/dietary information<br>Learn new skills<br>Use social media<br>Stay in touch with family / friends<br>Share views about music and movies<br>Share views about religion<br>Share views about politics<br>Share views about work<br>Other |
